# Supplementary material for: Prediction and classification of Alzheimer disease based on quantification of MRI deformation
Source: PubMed Central journal article supplement (PMC5338815; doi:10.1371/journal.pone.0173372), 2017-03-06

## ACKNOWLEDGEMENT LIST FOR ADNI PUBLICATIONS

The Data and Publications Committee, in keeping with the publication policies adopted by the ADNI Steering Committee, here provide lists for standardized acknowledgement. The list consists of two parts: I. ADNI Infrastructure Investigators and Site Investigators and II. DOD ADNI Infrastructure Investigators and Site Investigators. Infrastructure Investigators represent the names responsible for leadership and infrastructure. Site Investigators represent the names of individuals at each recruiting site. All papers, including methodological papers, should have an acknowledgement list that consists of Infrastructure Investigators plus the FULL list.

### I. ADNI I, GO and II

#### Part A: Leadership and Infrastructure

##### **Principal Investigator**

Michael W. Weiner, MD UC San Francisco

##### **ADCS PI and Director of Coordinating Center Clinical Core**

Paul Aisen, MD University of Southern California

##### **Executive Committee**

|                             |                                                     |
|-----------------------------|-----------------------------------------------------|
| Michael Weiner, MD          | UC San Francisco                                    |
| Paul Aisen, MD              | University of Southern California                   |
| Ronald Petersen, MD, PhD    | Mayo Clinic, Rochester                              |
| Clifford R. Jack, Jr., MD   | Mayo Clinic, Rochester                              |
| William Jagust, MD          | UC Berkeley                                         |
| John Q. Trojanowki, MD, PhD | U Pennsylvania                                      |
| Arthur W. Toga, PhD         | USC                                                 |
| Laurel Beckett, PhD         | UC Davis                                            |
| Robert C. Green, MD, MPH    | Brigham and Women's Hospital/Harvard Medical School |
| Andrew J. Saykin, PsyD      | Indiana University                                  |
| John Morris, MD             | Washington University St. Louis                     |
| Leslie M. Shaw              | University of Pennsylvania                          |

##### **ADNI External Advisory Board (ESAB)**

|                         |                                                           |
|-------------------------|-----------------------------------------------------------|
| Zaven Khachaturian, PhD | Prevent Alzheimer's Disease 2020 (Chair)                  |
| Greg Sorensen, MD       | Siemens                                                   |
| Maria Carrillo, PhD     | Alzheimer's Association                                   |
| Lew Kuller, MD          | University of Pittsburgh                                  |
| Marc Raichle, MD        | Washington University St. Louis                           |
| Steven Paul, MD         | Cornell University                                        |
| Peter Davies, MD        | Albert Einstein College of Medicine of Yeshiva University |
| Howard Fillit, MD       | AD Drug Discovery Foundation                              |
| Franz Hefti, PhD        | Acumen Pharmaceuticals                                    |
| David Holtzman, MD      | Washington University St. Louis                           |
| M. Marcel Mesulam, MD   | Northwestern University                                   |
| William Potter, MD      | National Institute of Mental Health                       |
| Peter Snyder, PhD       | Brown University                                          |

##### **ADNI 2 Private Partner Scientific Board (PPSB)**

Adam Schwartz, MD Eli Lilly (Chair)

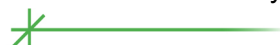

**Data and Publications Committee**

Robert C. Green, MD, MPH BWH/HMS (Chair)

**Resource Allocation Review Committee**

Tom Montine, MD, PhD University of Washington (Chair)

**Clinical Core Leaders**

Ronald Petersen, MD, PhD Mayo Clinic, Rochester (Core PI)  
Paul Aisen, MD University of Southern California

**Clinical Informatics and Operations**

Ronald G. Thomas, PhD UC San Diego  
Michael Donohue, PhD UC San Diego  
Sarah Walter, MSc UC San Diego  
Devon Gessert UC San Diego  
Tamie Sather, MA UC San Diego  
Gus Jiminez, MBS UC San Diego  
Archana B. Balasubramanian, PhD UC San Diego  
Jennifer Mason, MPH UC San Diego  
Iris Sim UC San Diego

**Biostatistics Core Leaders and Key Personnel**

Laurel Beckett, PhD UC Davis (Core PI)  
Danielle Harvey, PhD UC Davis  
Michael Donohue, PhD UC San Diego

**MRI Core Leaders and Key Personnel**

Clifford R. Jack, Jr., MD Mayo Clinic, Rochester (Core PI)  
Matthew Bernstein, PhD Mayo Clinic, Rochester  
Nick Fox, MD University of London  
Paul Thompson, PhD UCLA School of Medicine  
Norbert Schuff, PhD UCSF MRI  
Charles DeCarli, MD UC Davis  
Bret Borowski, RT Mayo Clinic  
Jeff Gunter, PhD Mayo Clinic  
Matt Senjem, MS Mayo Clinic  
Prashanthi Vemuri, PhD Mayo Clinic  
David Jones, MD Mayo Clinic  
Kejal Kantarci Mayo Clinic  
Chad Ward Mayo Clinic

**PET Core Leaders and Key Personnel**

William Jagust, MD UC Berkeley (Core PI)  
Robert A. Koeppe, PhD University of Michigan  
Norm Foster, MD University of Utah  
Eric M. Reiman, MD Banner Alzheimer's Institute  
Kewei Chen, PhD Banner Alzheimer's Institute  
Chet Mathis, MD University of Pittsburgh  
Susan Landau, PhD UC Berkeley

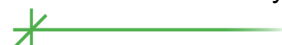

**Neuropathology Core Leaders**

|                                                             |                                 |
|-------------------------------------------------------------|---------------------------------|
| John C. Morris, MD                                          | Washington University St. Louis |
| Nigel J. Cairns, PhD, FRCPath                               | Washington University St. Louis |
| Erin Franklin, MS, CCRP                                     | Washington University St. Louis |
| Lisa Taylor-Reinwald, BA, HTL<br>(ASCP) – Past Investigator | Washington University St. Louis |

**Biomarkers Core Leaders and Key Personnel**

|                             |                          |
|-----------------------------|--------------------------|
| Leslie M. Shaw, PhD         | UPenn School of Medicine |
| John Q. Trojanowki, MD, PhD | UPenn School of Medicine |
| Virginia Lee, PhD, MBA      | UPenn School of Medicine |
| Magdalena Korecka, PhD      | UPenn School of Medicine |
| Michal Figurski, PhD        | UPenn School of Medicine |

**Informatics Core Leaders and Key Personnel**

|                     |               |
|---------------------|---------------|
| Arthur W. Toga, PhD | USC (Core PI) |
| Karen Crawford      | USC           |
| Scott Neu, PhD      | USC           |

**Genetics Core Leaders and Key Personnel**

|                        |                    |
|------------------------|--------------------|
| Andrew J. Saykin, PsyD | Indiana University |
| Tatiana M. Foroud, PhD | Indiana University |
| Steven Potkin, MD UC   | UC Irvine          |
| Li Shen, PhD           | Indiana University |
| Kelley Faber, MS, CCRC | Indiana University |
| Sungeun Kim, PhD       | Indiana University |
| Kwangsik Nho, PhD      | Indiana University |

**Initial Concept Planning & Development**

|                         |                                  |
|-------------------------|----------------------------------|
| Michael W. Weiner, MD   | UC San Francisco                 |
| Lean Thal, MD           | UC San Diego                     |
| Zaven Khachaturian, PhD | Prevent Alzheimer's Disease 2020 |

**Early Project Proposal Development**

|                         |                                     |
|-------------------------|-------------------------------------|
| Leon Thal, MD           | UC San Diego                        |
| Neil Buckholtz          | National Institute on Aging         |
| Michael W. Weiner, MD   | UC San Francisco                    |
| Peter J. Snyder, PhD    | Brown University                    |
| William Potter, MD      | National Institute of Mental Health |
| Steven Paul, MD         | Cornell University                  |
| Marilyn Albert, PhD     | Johns Hopkins University            |
| Richard Frank, MD, PhD  | Richard Frank Consulting            |
| Zaven Khachaturian, PhD | Prevent Alzheimer's Disease 2020    |

**NIA**

|                |                             |
|----------------|-----------------------------|
| John Hsiao, MD | National Institute on Aging |
|----------------|-----------------------------|



## **Part B: Investigators By Site**

### **Oregon Health & Science University:**

Jeffrey Kaye, MD  
Joseph Quinn, MD  
Lisa Silbert, MD  
Betty Lind, BS  
Raina Carter, BA – Past Investigator  
Sara Dolen, BS – Past Investigator

### **University of Southern California:**

Lon S. Schneider, MD  
Sonia Pawluczyk, MD  
Mauricio Becerra, BS  
Liberty Teodoro, RN  
Bryan M. Spann, DO, PhD – Past Investigator

### **University of California – San Diego:**

James Brewer, MD, PhD  
Helen Vanderswag, RN  
Adam Fleisher, MD – Past Investigator

### **University of Michigan:**

Judith L. Heidebrink, MD, MS  
Joanne L. Lord, LPN, BA, CCRC – Past Investigator

### **Mayo Clinic, Rochester:**

Ronald Petersen, MD, PhD  
Sara S. Mason, RN  
Colleen S. Albers, RN  
David Knopman, MD  
Kris Johnson, RN – Past Investigator

### **Baylor College of Medicine:**

Rachelle S. Doody, MD, PhD  
Javier Villanueva-Meyer, MD  
Valory Pavlik, PhD  
Victoria Shibley, MS  
Munir Chowdhury, MBBS, MS – Past Investigator  
Susan Rountree, MD – Past Investigator  
Mimi Dang, MD – Past Investigator

### **Columbia University Medical Center:**

Yaakov Stern, PhD  
Lawrence S. Honig, MD, PhD  
Karen L. Bell, MD

### **Washington University, St. Louis:**

Beau Ances, MD  
John C. Morris, MD  
Maria Carroll, RN, MSN  
Mary L. Creech, RN, MSW  
Erin Franklin, MS, CCRP  
Mark A. Mintun, MD – Past Investigator  
Stacy Schneider, APRN, BC, GNP – Past Investigator  
Angela Oliver, RN, BSN, MSG – Past Investigator

### **University of Alabama - Birmingham:**

Daniel Marson, JD, PhD  
David Geldmacher, MD  
Marissa Natelson Love, MD  
Randall Griffith, PhD, ABPP – Past Investigator  
David Clark, MD – Past Investigator  
John Brockington, MD – Past Investigator  
Erik Roberson, MD – Past Investigator

### **Mount Sinai School of Medicine:**

Hillel Grossman, MD  
Effie Mitsis, PhD

### **Rush University Medical Center:**

Raj C. Shah, MD  
Leyla deToledo-Morrell, PhD – Past Investigator

### **Wien Center:**

Ranjan Duara, MD  
Maria T. Greig-Custo, MD  
Warren Barker, MA, MS

### **Johns Hopkins University:**

Marilyn Albert, PhD  
Chiadi Onyike, MD  
Daniel D'Agostino II, BS  
Stephanie Kielb, BS – Past Investigator

### **New York University:**

Martin Sadowski, MD, PhD  
Mohammed O. Sheikh, MD  
Anasztasia Ulysse  
Mrunalini Gaikwad

### **Duke University Medical Center:**

P. Murali Doraiswamy, MBBS, FRCP  
Jeffrey R. Petrella, MD



Salvador Borges-Neto, MD  
Terence Z. Wong, MD – Past Investigator  
Edward Coleman – Past Investigator

**University of Pennsylvania:**

Steven E. Arnold, MD  
Jason H. Karlawish, MD  
David A. Wolk, MD  
Christopher M. Clark, MD

**University of Kentucky:**

Charles D. Smith, MD  
Greg Jicha, MD  
Peter Hardy, PhD  
Partha Sinha, PhD  
Elizabeth Oates, MD  
Gary Conrad, MD

**University of Pittsburgh:**

Oscar L. Lopez, MD  
MaryAnn Oakley, MA  
Donna M. Simpson, CRNP, MPH

**University of Rochester Medical Center:**

Anton P. Porsteinsson, MD  
Bonnie S. Goldstein, MS, NP  
Kim Martin, RN  
Kelly M. Makino, BS – Past Investigator  
M. Saleem Ismail, MD – Past Investigator  
Connie Brand, RN – Past Investigator

**University of California, Irvine:**

Steven G. Potkin, MD  
Adrian Preda, MD  
Dana Nguyen, PhD

**University of Texas Southwestern Medical School:**

Kyle Womack, MD  
Dana Mathews, MD, PhD  
Mary Quiceno, MD

**Emory University:**

Allan I. Levey, MD, PhD  
James J. Lah, MD, PhD  
Janet S. Cellar, DNP, PMHCNS-BC

**University of Kansas, Medical Center:**

Jeffrey M. Burns, MD  
Russell H. Swerdlow, MD

William M. Brooks, PhD

**University of California, Los Angeles:**

Liana Apostolova, MD  
Kathleen Tingus, PhD  
Ellen Woo, PhD  
Daniel H.S. Silverman, MD, PhD  
Po H. Lu, PsyD – Past Investigator  
George Bartzokis, MD – Past Investigator

**Mayo Clinic, Jacksonville:**

Neill R Graff-Radford, MBBCH, FRCP (London)  
Francine Parfitt, MSH, CCRC  
Kim Poki-Walker, BA

**Indiana University:**

Martin R. Farlow, MD  
Ann Marie Hake, MD  
Brandy R. Matthews, MD – Past Investigator  
Jared R. Brosch, MD  
Scott Herring, RN, CCRC

**Yale University School of Medicine:**

Christopher H. van Dyck, MD  
Richard E. Carson, PhD  
Martha G. MacAvoy, PhD  
Pradeep Varma, MD

**McGill Univ., Montreal-Jewish General Hospital:**

Howard Chertkow, MD  
Howard Bergman, MD  
Chris Hosein, MEd

**Sunnybrook Health Sciences, Ontario:**

Sandra Black, MD, FRCPC  
Bojana Stefanovic, PhD  
Curtis Caldwell, PhD

**U.B.C. Clinic for AD & Related Disorders:**

Ging-Yuek Robin Hsiung, MD, MHSc, FRCPC  
Benita Mudge, BS  
Vesna Sossi, PhD  
Howard Feldman, MD, FRCPC – Past Investigator  
Michele Assaly, MA – Past Investigator

**Cognitive Neurology - St. Joseph's, Ontario:**

Elizabeth Finger, MD  
Stephen Pasternack, MD, PhD  
Irina Rachisky, MD  
Dick Trost, PhD – Past Investigator



Andrew Kertesz, MD – Past Investigator

**Cleveland Clinic Lou Ruvo Center for Brain Health:**

Charles Bernick, MD, MPH  
Donna Munic, PhD

**Northwestern University:**

Marek-Marsel Mesulam, MD  
Emily Rogalski, PhD  
Kristine Lipowski, MA  
Sandra Weintraub, PhD  
Borna Bonakdarpour, MD  
Diana Kerwin, MD – Past Investigator  
Chuang-Kuo Wu, MD, PhD – Past Investigator  
Nancy Johnson, PhD – Past Investigator

**Premiere Research Inst (Palm Beach Neurology):**

Carl Sadowsky, MD  
Teresa Villena, MD

**Georgetown University Medical Center:**

Raymond Scott Turner, MD, PhD  
Kathleen Johnson, NP  
Brigid Reynolds, NP

**Brigham and Women's Hospital:**

Reisa A. Sperling, MD  
Keith A. Johnson, MD  
Gad Marshall, MD

**Stanford University:**

Jerome Yesavage, MD  
Joy L. Taylor, PhD  
Barton Lane, MD  
Allyson Rosen, PhD – Past Investigator  
Jared Tinklenberg, MD – Past Investigator

**Banner Sun Health Research Institute:**

Marwan N. Sabbagh, MD  
Christine M. Belden, PsyD  
Sandra A. Jacobson, MD  
Sherye A. Sirrel, CCRC

**Boston University:**

Neil Kowall, MD  
Ronald Killiany, PhD  
Andrew E. Budson, MD  
Alexander Norbash, MD – Past Investigator

Patricia Lynn Johnson, BA – Past Investigator

**Howard University:**

Thomas O. Obisesan, MD, MPH  
Saba Wolday, MSc  
Joanne Allard, PhD

**Case Western Reserve University:**

Alan Lerner, MD  
Paula Ogrocki, PhD  
Curtis Tatsuoka, PhD  
Parianne Fatica, BA, CCRC

**University of California, Davis – Sacramento:**

Evan Fletcher, PhD  
Pauline Maillard, PhD  
John Olichney, MD  
Charles DeCarli, MD – Past Investigator  
Owen Carmichael, PhD – Past Investigator

**Neurological Care of CNY:**

Smita Kittur, MD – Past Investigator

**Parkwood Hospital:**

Michael Borrie, MB ChB  
T-Y Lee, PhD  
Dr Rob Bartha, PhD

**University of Wisconsin:**

Sterling Johnson, PhD  
Sanjay Asthana, MD  
Cynthia M. Carlsson, MD, MS

**University of California, Irvine - BIC:**

Steven G. Potkin, MD  
Adrian Preda, MD  
Dana Nguyen, PhD

**Banner Alzheimer's Institute:**

Pierre Tariot, MD  
Anna Burke, MD  
Ann Marie Milliken, NMD  
Nadira Trncic, MD, PhD, CCRC – Past Investigator  
Adam Fleisher, MD – Past Investigator  
Stephanie Reeder, BA – Past Investigator

**Dent Neurologic Institute:**

Vernice Bates, MD  
Horacio Capote, MD  
Michelle Rainka, PharmD, CCRP



**Ohio State University:**

Douglas W. Scharre, MD  
Maria Kataki, MD, PhD  
Brendan Kelley, MD

**Albany Medical College:**

Earl A. Zimmerman, MD  
Dzintra Celmins, MD  
Alice D. Brown, FNP

**Hartford Hospital, Olin Neuropsychiatry  
Research Center:**

Godfrey D. Pearlson, MD  
Karen Blank, MD  
Karen Anderson, RN

**Dartmouth-Hitchcock Medical Center:**

Laura A. Flashman, PhD  
Marc Seltzer, MD  
Mary L. Hynes, RN, MPH  
Robert B. Santulli, MD – Past Investigator

**Wake Forest University Health Sciences:**

Kaycee M. Sink, MD, MAS  
Leslie Gordineer  
Jeff D. Williamson, MD, MHS – Past Investigator  
Pradeep Garg, PhD – Past Investigator  
Franklin Watkins, MD – Past Investigator

**Rhode Island Hospital:**

Brian R. Ott, MD  
Geoffrey Tremont, PhD  
Lori A. Daiello, Pharm.D, ScM

**Butler Hospital:**

Stephen Salloway, MD, MS  
Paul Malloy, PhD  
Stephen Correia, PhD

**UC San Francisco:**

Howard J. Rosen, MD  
Bruce L. Miller, MD  
David Perry, MD

**Medical University South Carolina:**

Jacobo Mintzer, MD, MBA  
Kenneth Spicer, MD, PhD  
David Bachman, MD

**St. Joseph's Health Care:**

Elizabeth Finger, MD  
Stephen Pasternak, MD  
Irina Rachinsky, MD  
John Rogers, MD  
Andrew Kertesz, MD – Past Investigator  
Dick Drost, MD – Past Investigator

**Nathan Kline Institute**

Nunzio Pomara, MD  
Raymundo Hernando, MD  
Antero Sarrael, MD

**University of Iowa College of Medicine**

Susan K. Schultz, MD  
Karen Ekstam Smith, RN  
Hristina Koleva, MD  
Ki Won Nam, MD  
Hyungsub Shim, MD– Past Investigator

**Cornell University**

Norman Relkin, MD, PhD  
Gloria Chiang, MD  
Michael Lin, MD  
Lisa Ravdin, PhD

**University of South Florida: USF Health Byrd  
Alzheimer's Institute**

Amanda Smith, MD  
Balebail Ashok Raj, MD  
Kristin Fargher, MD– Past Investigator







**San Francisco Veterans Affairs Medical Center**

|                   |                  |
|-------------------|------------------|
| Thomas Neylan, MD | UC San Francisco |
| Jacqueline Hayes  | UC San Francisco |
| Shannon Finley    | UC San Francisco |

**Biostatistics Core Leaders and Key Personnel**

|                      |                    |
|----------------------|--------------------|
| Danielle Harvey, PhD | UC Davis (Core PI) |
| Michael Donohue, PhD | UC San Diego       |

**MRI Core Leaders and Key Personnel**

|                           |                                  |
|---------------------------|----------------------------------|
| Clifford R. Jack, Jr., MD | Mayo Clinic, Rochester (Core PI) |
| Matthew Bernstein, PhD    | Mayo Clinic, Rochester           |
| Bret Borowski, RT         | Mayo Clinic                      |
| Jeff Gunter, PhD          | Mayo Clinic                      |
| Matt Senjem, MS           | Mayo Clinic                      |
| Kejal Kantarci            | Mayo Clinic                      |
| Chad Ward                 | Mayo Clinic                      |

**PET Core Leaders and Key Personnel**

|                       |                              |
|-----------------------|------------------------------|
| William Jagust, MD    | UC Berkeley (Core PI)        |
| Robert A. Koeppe, PhD | University of Michigan       |
| Norm Foster, MD       | University of Utah           |
| Eric M. Reiman, MD    | Banner Alzheimer's Institute |
| Kewei Chen, PhD       | Banner Alzheimer's Institute |
| Susan Landau, PhD     | UC Berkeley                  |

**Neuropathology Core Leaders**

|                               |                                 |
|-------------------------------|---------------------------------|
| John C. Morris, MD            | Washington University St. Louis |
| Nigel J. Cairns, PhD, FRCPath | Washington University St. Louis |
| Erin Householder, MS          | Washington University St. Louis |

**Biomarkers Core Leaders and Key Personnel**

|                             |                                    |
|-----------------------------|------------------------------------|
| Leslie M. Shaw, PhD         | Perelman School of Medicine, UPenn |
| John Q. Trojanowki, MD, PhD | Perelman School of Medicine, UPenn |
| Virginia Lee, PhD, MBA      | Perelman School of Medicine, UPenn |
| Magdalena Korecka, PhD      | Perelman School of Medicine, UPenn |
| Michal Figurski, PhD        | Perelman School of Medicine, UPenn |

**Informatics Core Leaders and Key Personnel**

|                     |               |
|---------------------|---------------|
| Arthur W. Toga, PhD | USC (Core PI) |
| Karen Crawford      | USC           |
| Scott Neu, PhD      | USC           |

**Genetics Core Leaders and Key Personnel**

|                        |                    |
|------------------------|--------------------|
| Andrew J. Saykin, PsyD | Indiana University |
| Tatiana M. Foroud, PhD | Indiana University |
| Steven Potkin, MD UC   | UC Irvine          |
| Li Shen, PhD           | Indiana University |
| Kelley Faber, MS, CCRC | Indiana University |
| Sungeun Kim, PhD       | Indiana University |



University

**Initial Concept Planning & Development**

Michael W. Weiner, MD

UC San Francisco

Karl Friedl

Department of Defense (retired)

**Part B: Investigators By Site**

**University of Southern California:**

Lon S. Schneider, MD, MS

Sonia Pawluczyk, MD

Mauricio Becerra

**University of California, San Diego:**

James Brewer, MD, PhD

Helen Vanderswag, RN

**Columbia University Medical Center:**

Yaakov Stern, PhD

Lawrence S. Honig, MD, PhD

Karen L. Bell, MD

**Rush University Medical Center:**

Debra Fleischman, Ph.D.

Konstantinos Arfanakis, Ph.D.

Raj C. Shah, M.D.

**Wien Center:**

Dr. Ranjan Duara MD PI

Dr. Daniel Varon MD Co-PI

Maria T Greig HP Coordinator

**Duke University Medical Center:**

P. Murali Doraiswamy, MBBS

Jeffrey R. Petrella, MD

Olga James, MD

**University of Rochester Medical Center:**

Anton P. Porsteinsson, MD (director)

Bonnie Goldstein, MS, NP (coordinator)

Kimberly S. Martin, RN

**University of California, Irvine:**

Steven G. Potkin, MD

Adrian Preda, MD

Dana Nguyen, PhD

**Medical University South Carolina:**

Jacobo Mintzer, MD, MBA

Dino Massoglia, MD, PhD

Olga Brawman-Mintzer, MD



**Premiere Research Inst (Palm Beach Neurology):**

Carl Sadowsky, MD  
Walter Martinez, MD  
Teresa Villena, MD

**University of California, San Francisco:**

William Jagust MD  
Susan Landau PhD  
Howard Rosen, MD  
David Perry

**Georgetown University Medical Center:**

Raymond Scott Turner, MD, PhD  
Kelly Behan  
Brigid Reynolds, NP

**Brigham and Women's Hospital:**

Reisa A. Sperling, MD  
Keith A. Johnson, MD  
Gad Marshall, MD

**Banner Sun Health Research Institute:**

Marwan N. Sabbagh, MD  
Sandra A. Jacobson, MD  
Sherye A. Sirrel, MS, CCRC

**Howard University:**

Thomas O. Obisesan, MD, MPH  
Saba Wolday, MSc  
Joanne Allard, PhD

**University of Wisconsin:**

Sterling C. Johnson, Ph.D.  
J. Jay Fruehling, M.A.  
Sandra Harding, M.S.

**University of Washington:**

Elaine R. Peskind, MD  
Eric C. Petrie, MD, MS  
Gail Li, MD, PhD

**Stanford University:**

Jerome A. Yesavage, MD  
Joy L. Taylor, PhD  
Ansgar J. Furst, PhD  
Steven Chao, M.D.

**Cornell University:**

Norman Relkin, MD, PhD  
Gloria Chiang, MD



Supplement: pone.0173372.s001.pdf [file pone.0173372.s001.pdf]
